# Supplementary material for: Manipulation of autophagy: a novelly potential therapeutic strategy for retinal neovascularization
Source: BMC Ophthalmol. 2018 Apr 27;18:110. doi: 10.1186/s12886-018-0774-6 (PMC5924499; doi:10.1186/s12886-018-0774-6)
Supplement: Supplementary file 1 — Data of GFP-LC3B. The raw materials for statistics of percentage of punctate GFP cells in different groups. (XLS 84 kb) [file 12886_2018_774_MOESM1_ESM.xls]

## Sheet: Sheet1
Control	total GFP-positive cells	115	130	105
	cells with GFP+ puncta	15	25	20
	percentage	0.130435	0.192308	0.190476
hypoxia	total GFP-positive cells	140	60	105
	cells with GFP+ puncta	130	60	95
	percentage	0.928571	1	0.904762
hypoxia+3-MA	total GFP-positive cells	75	80	90
	cells with GFP+ puncta	65	70	70
	percentage	0.866667	0.875	0.777778
hypoixa+VEGF-ab	total GFP-positive cells	105	70	135
	cells with GFP+ puncta	100	70	130
	percentage	0.952381	1	0.962963
hypoixa+3-MA+VEGF-ab	total GFP-positive cells	90	125	75
	cells with GFP+ puncta	75	110	65
	percentage	0.833333	0.88	0.866667
